# Supplementary material
Source: PubMed Central journal article supplement (PMC4971788)
Supplement: Supplementary_Figures.pdf [file Supplementary_Figures.pdf]

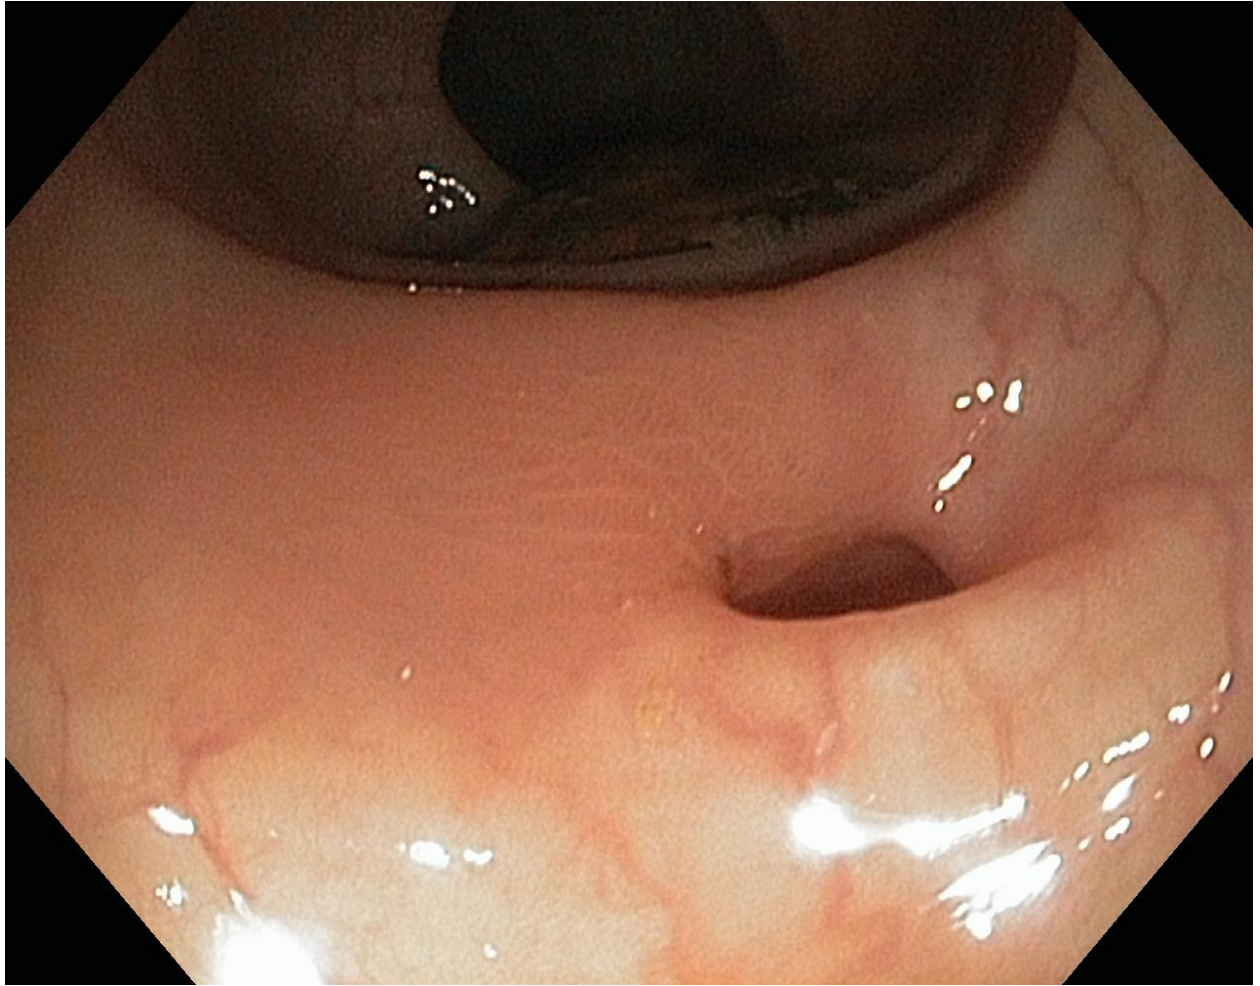

Figure: Edema

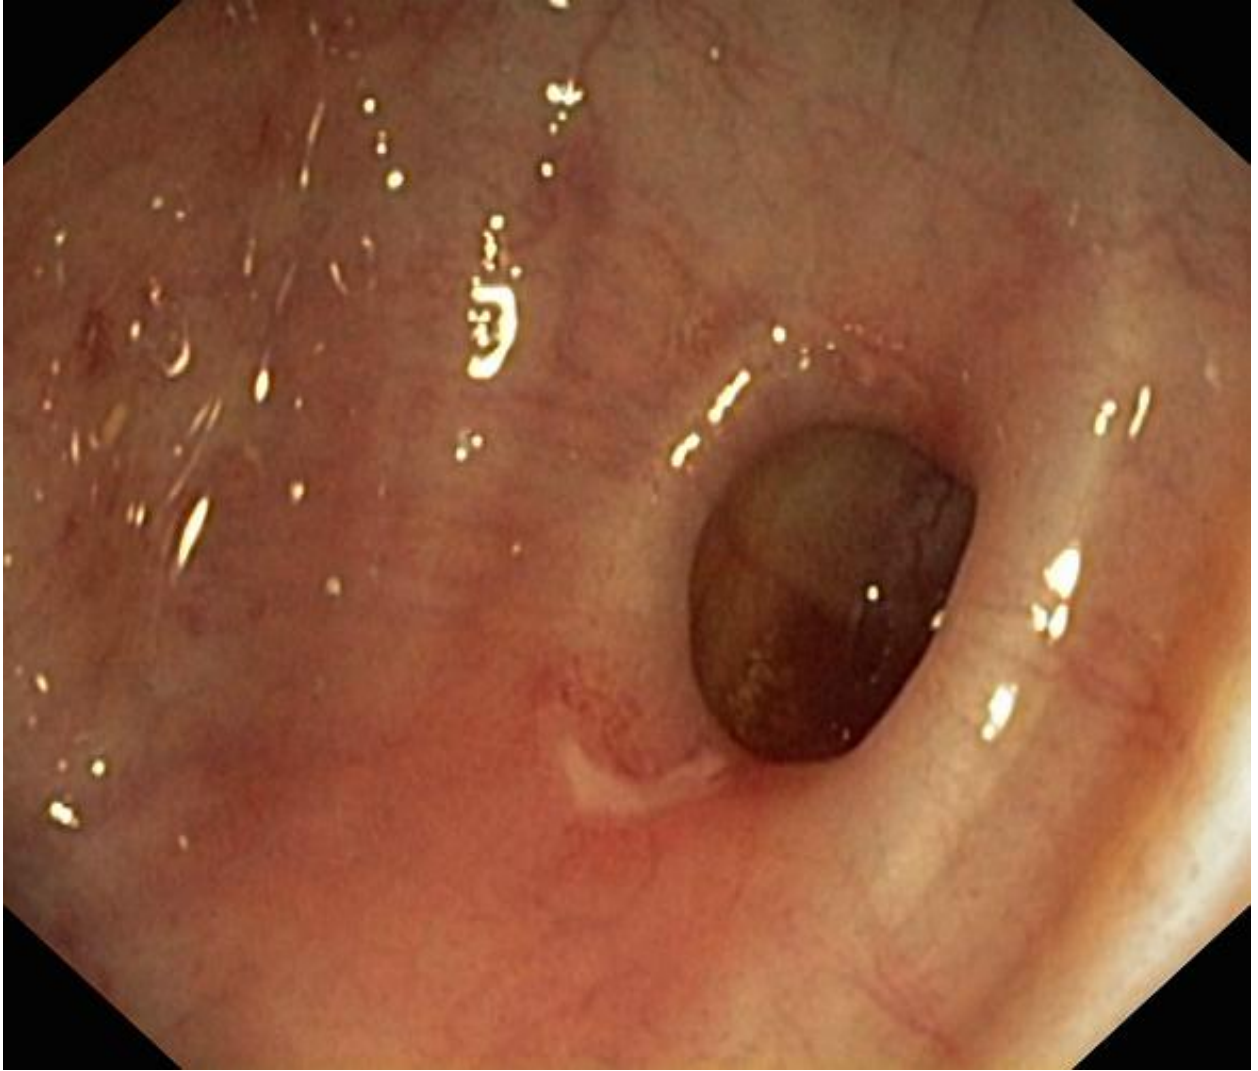

Figure: Erosions

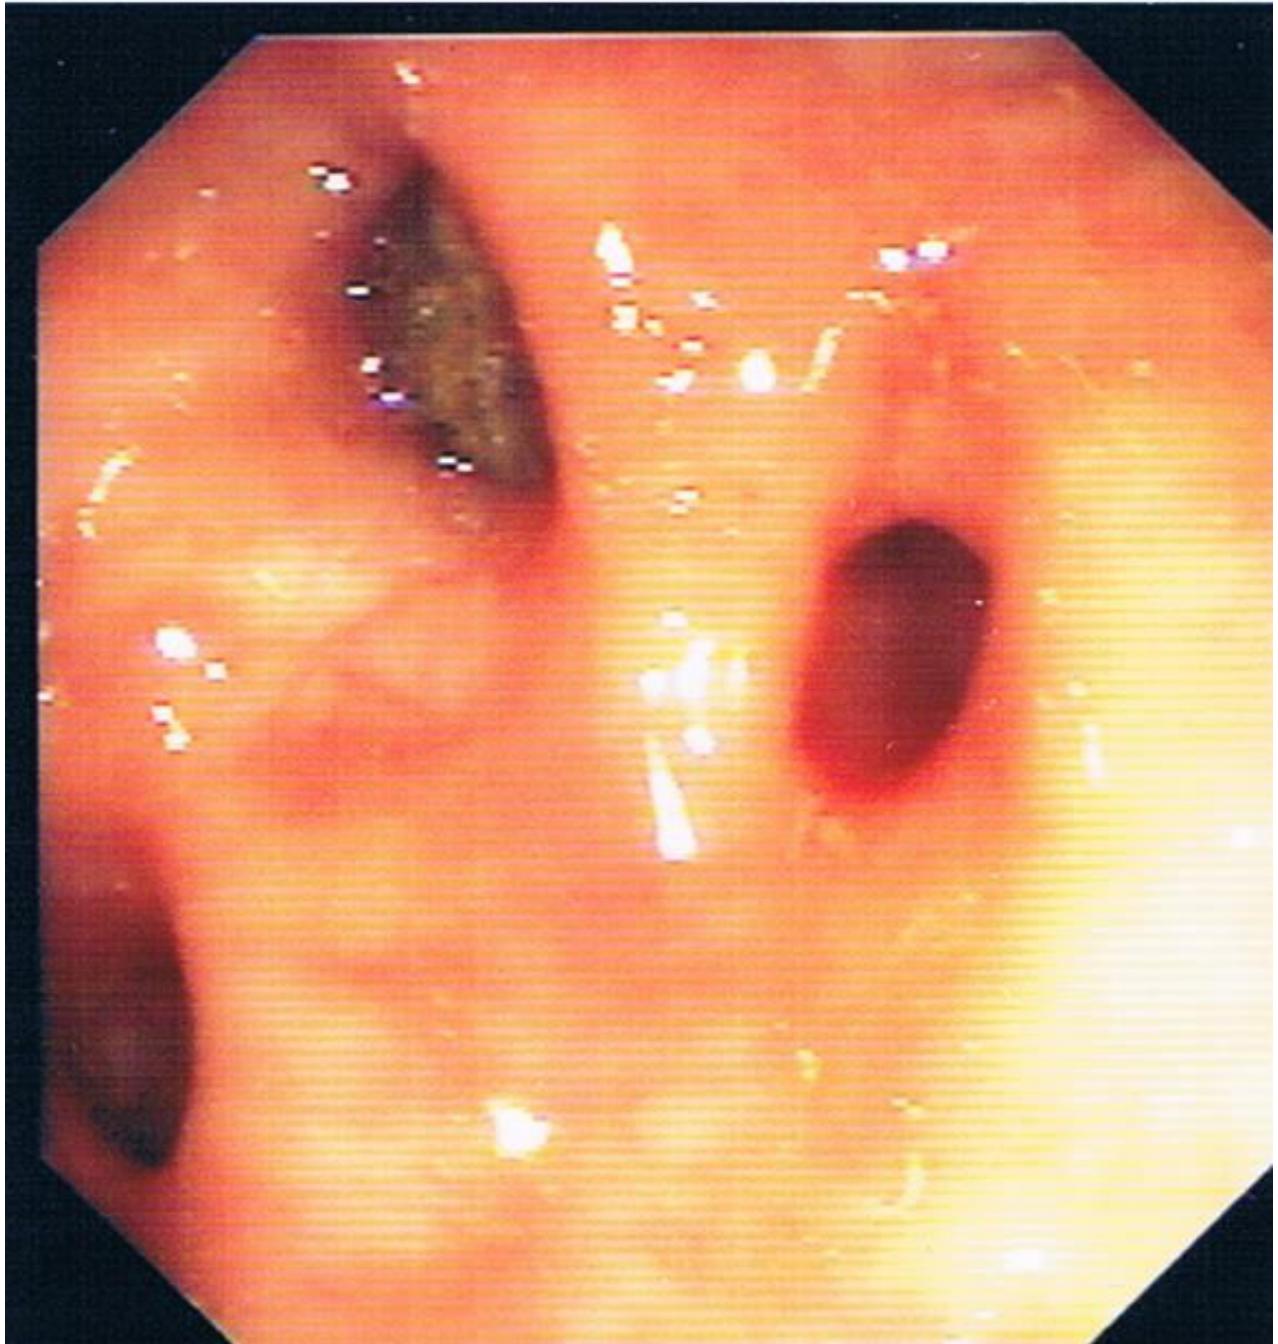

Figure: Hyperemia



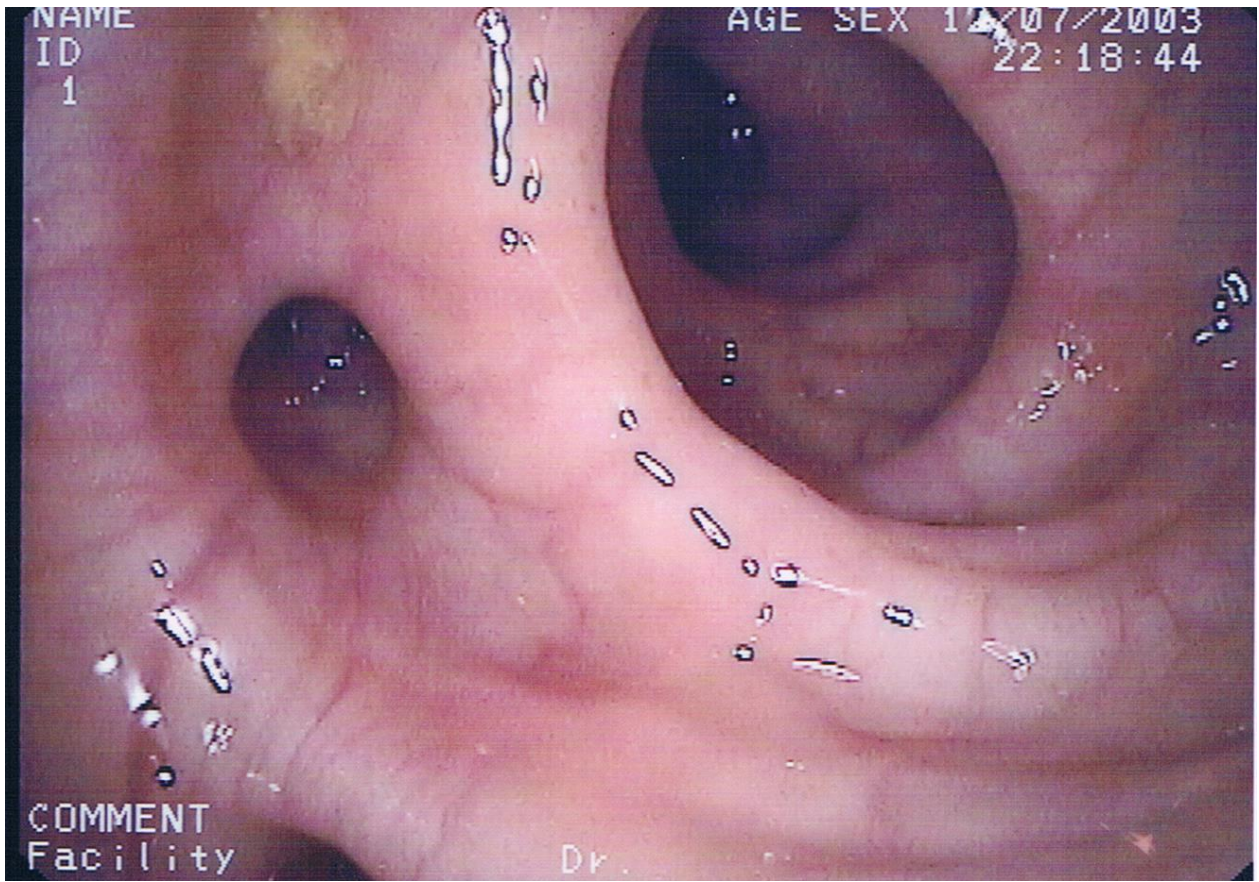

Figure: Left diverticulosis

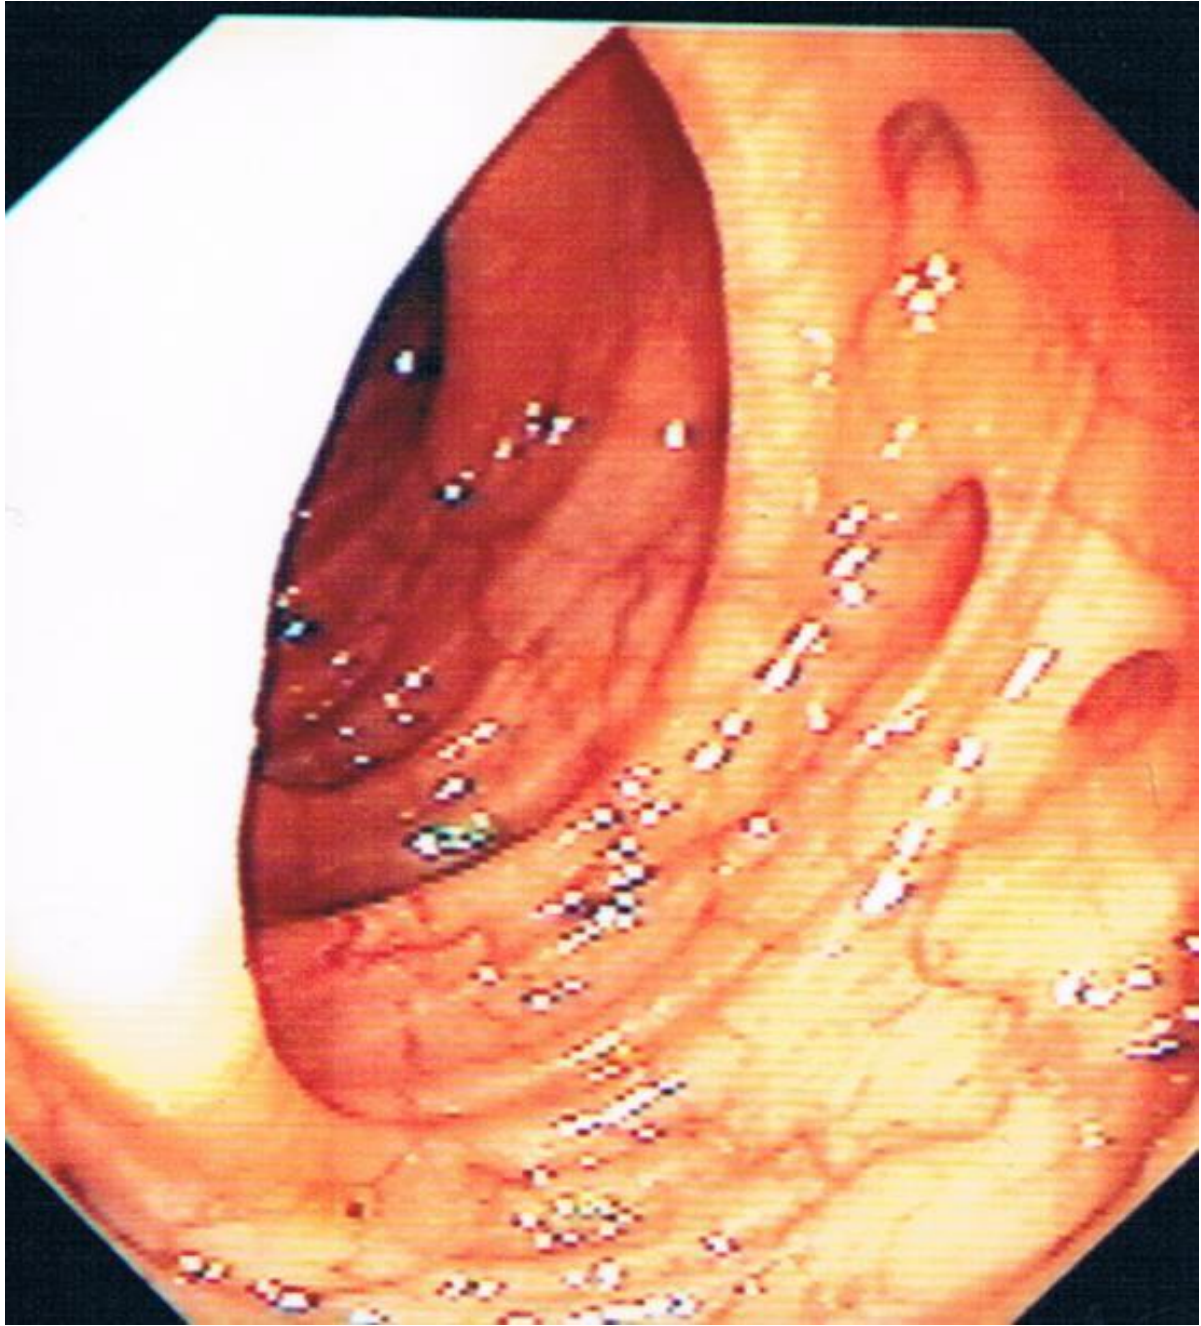

Figure: Less than 15 diverticula

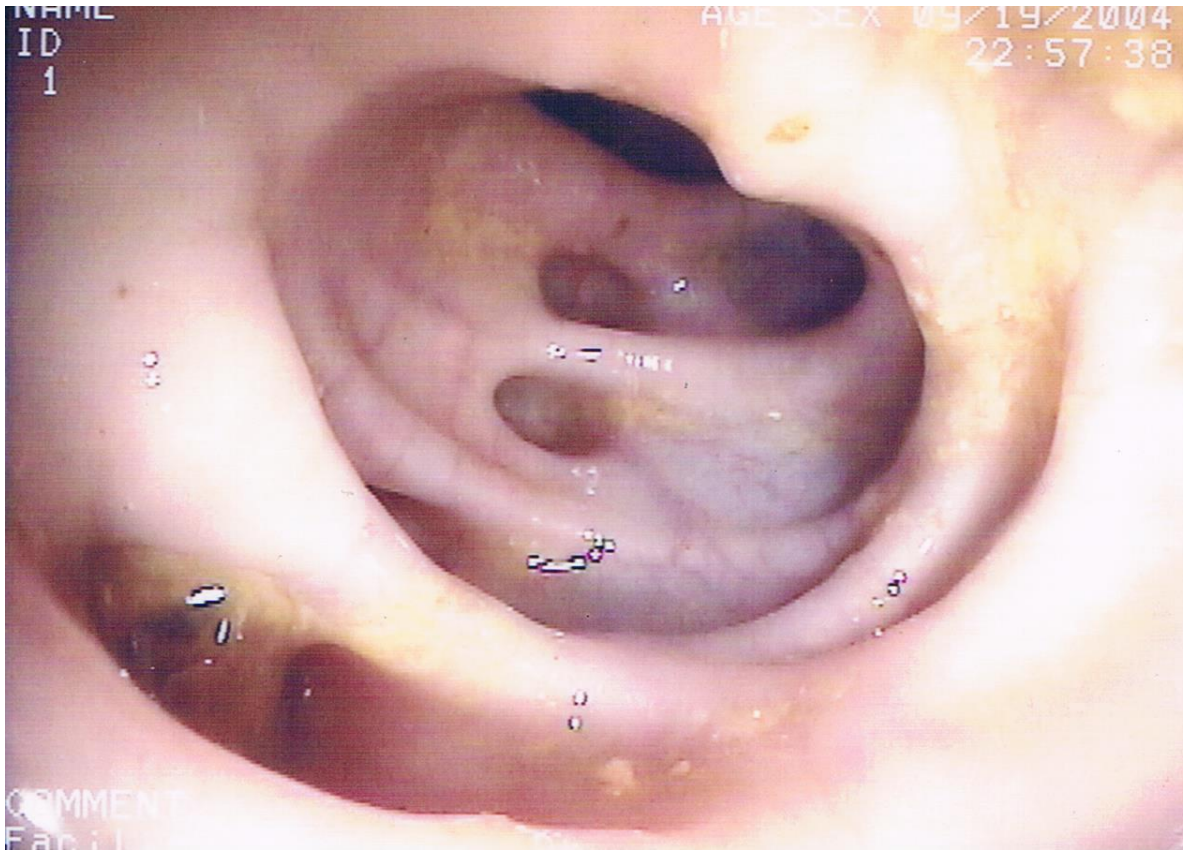

Figure: More than 15 diverticula



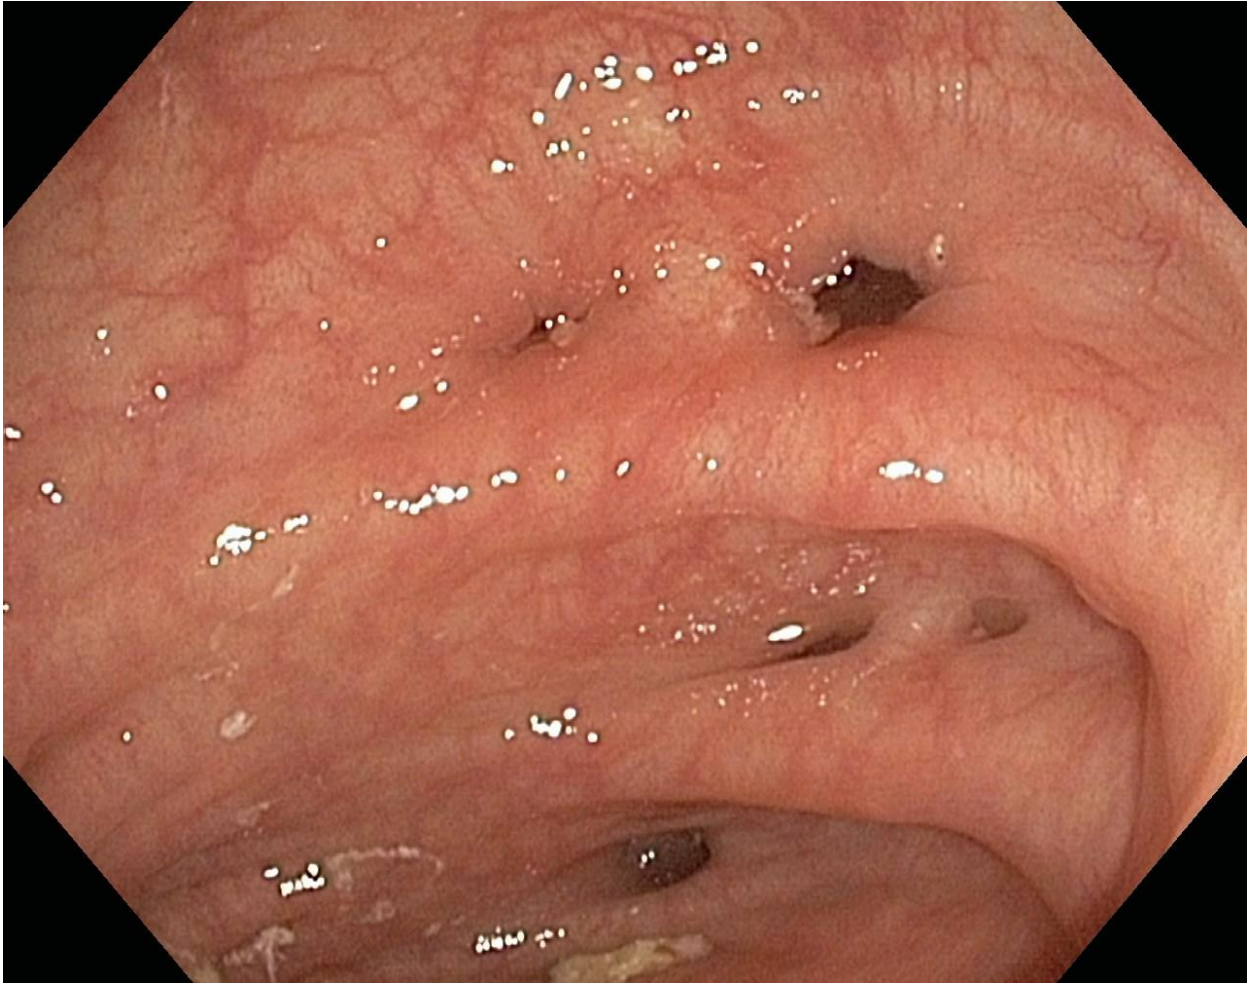

Figure: Pus

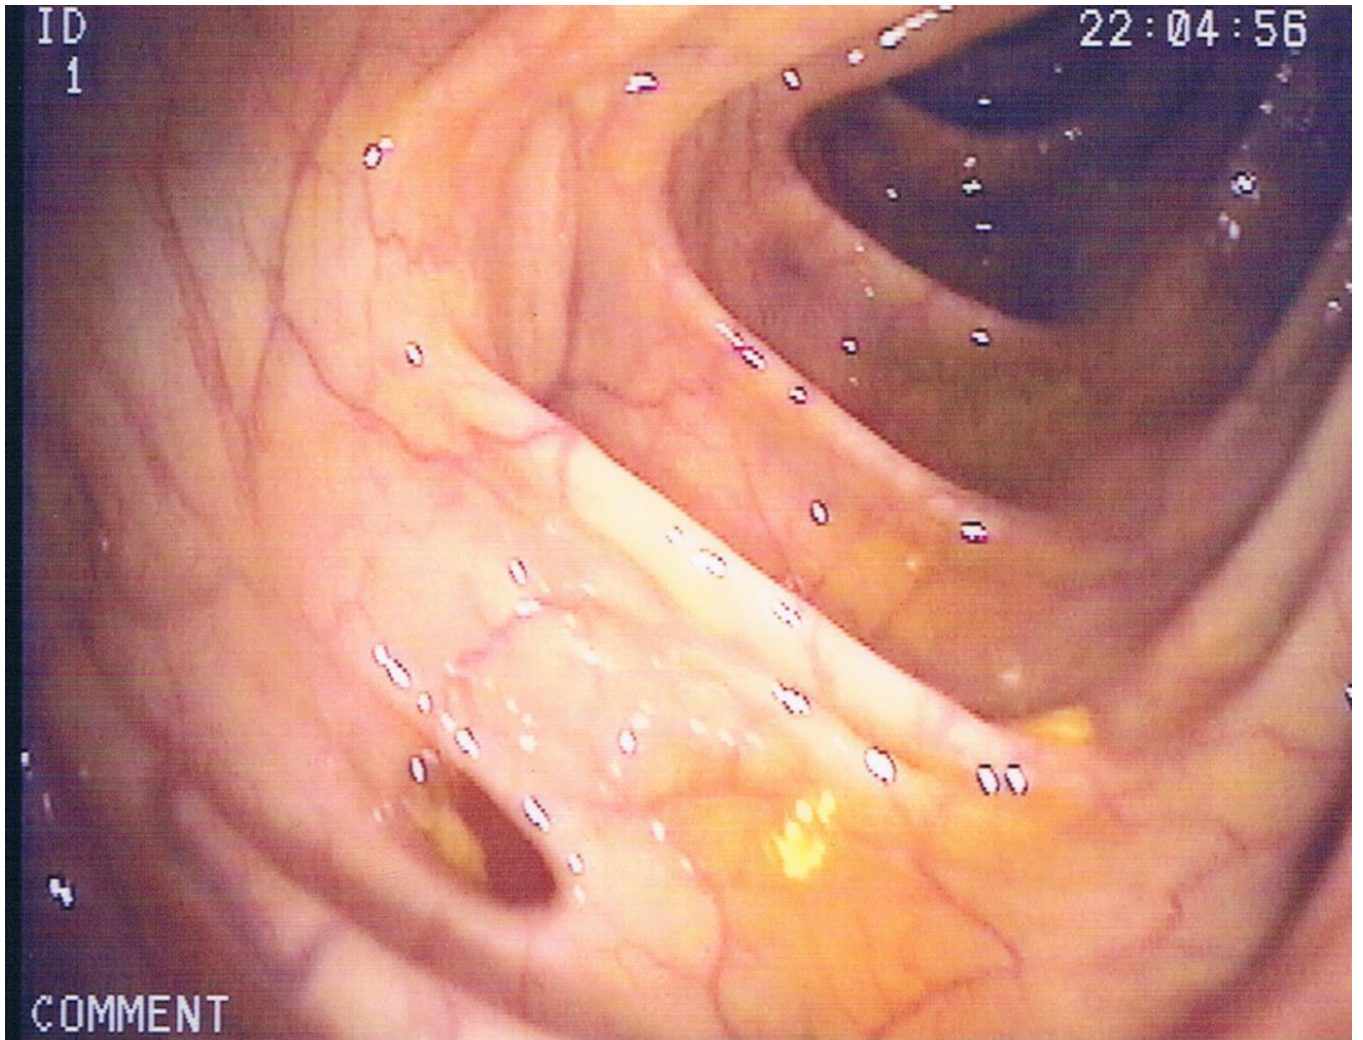

Figure: Right diverticulosis



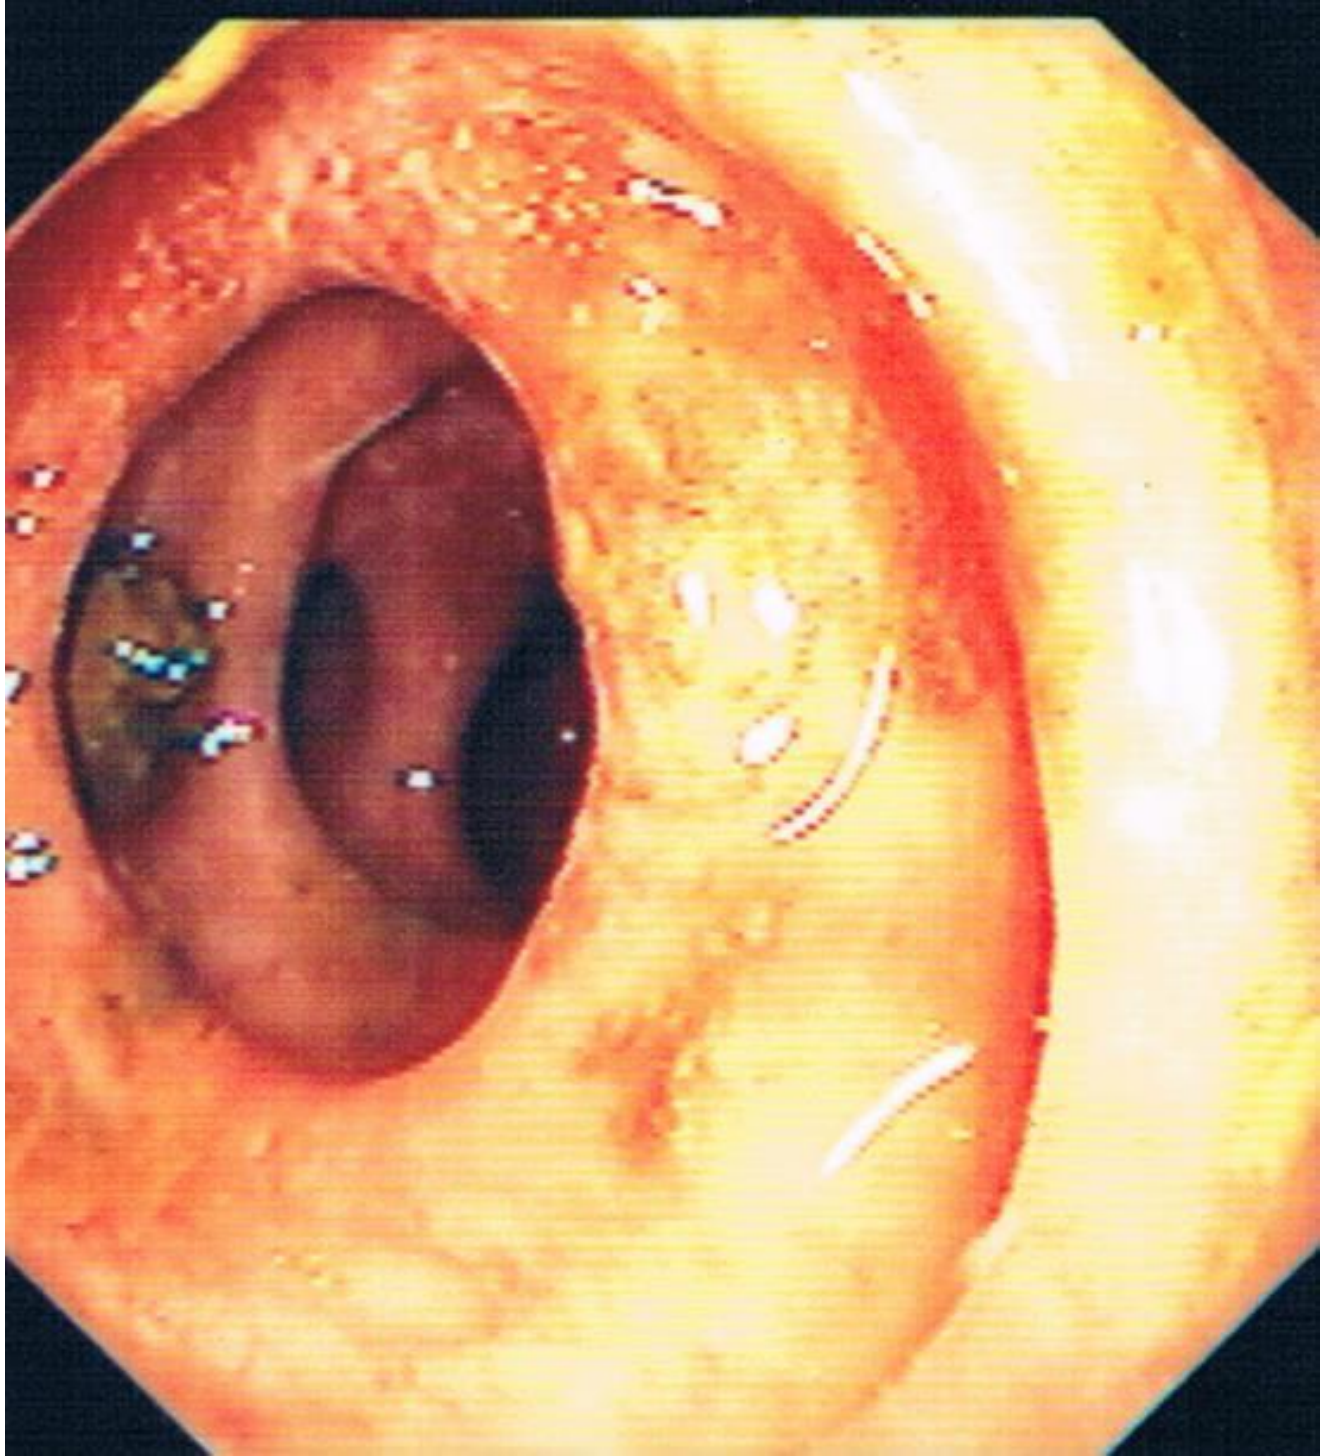

Figure: SCAD

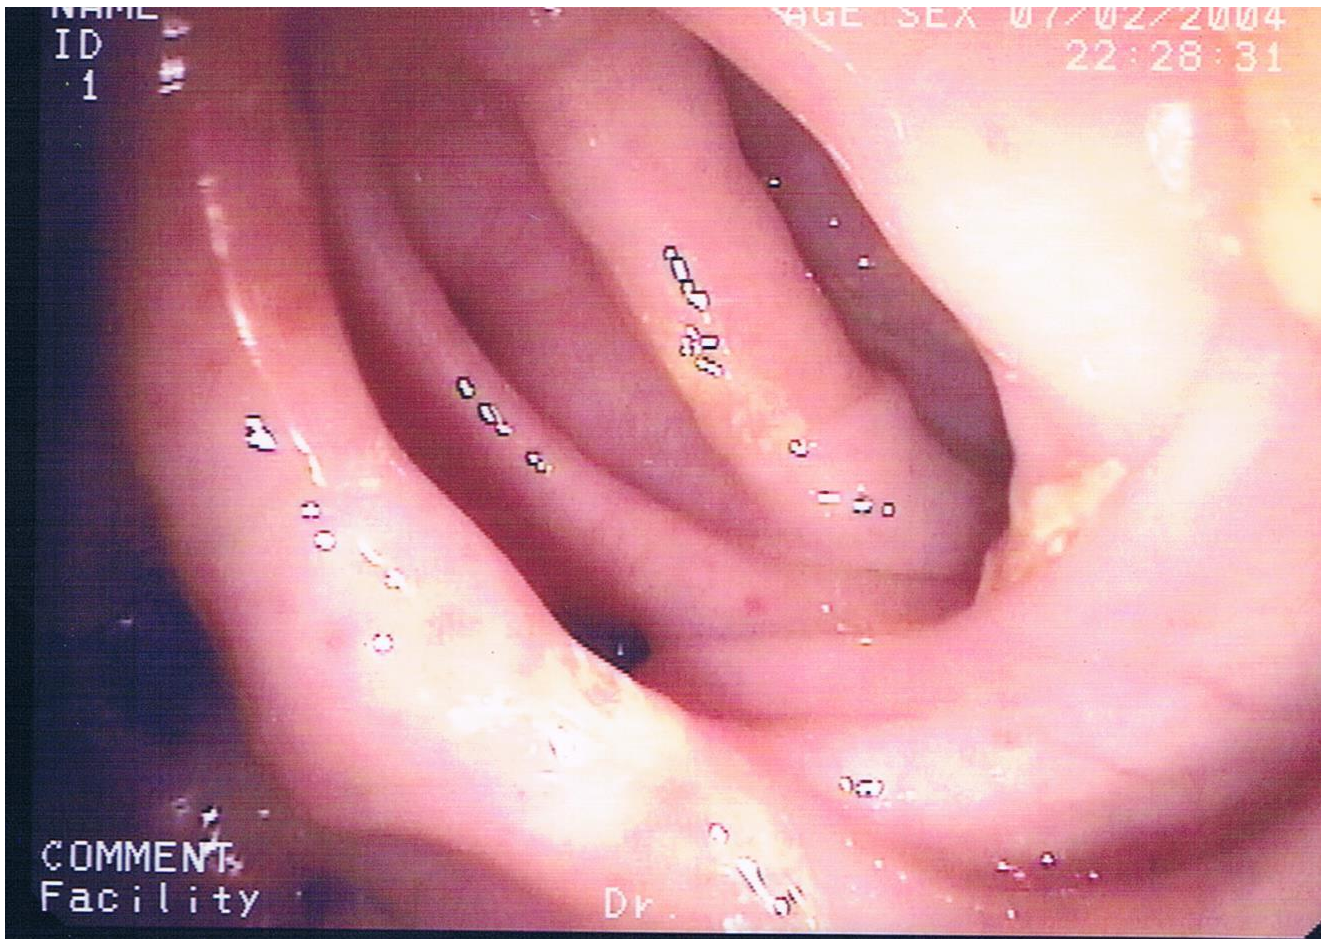

Figure: Stenosis
